# Supplementary material for: Engaging youth to take action to promote their well-being: Methods and findings from a knowledge mobilization project in Nova Scotia, Canada
Source: Research Square preprint supplement (doi:10.21203/rs.3.rs-6226486/v1), 2025-03-31
Supplement: Supplementary file 1 [file 12b046f118b5e33c98f044d3.docx]

Additional file 1: GRIPP2 short form checklist adapted from Staniszewska et al. (18)

| **Section and topic** | **Item** | **Reported on page No** |
| --- | --- | --- |
| 1: Aim | Report the aim of PPI in the study | 4 – 5 |
| 2: Methods | Provide a clear description of the methods used for PPI in the study | 5 – 17 |
| 3: Study results | Outcomes—Report the results of PPI in the study, including both positive and negative outcomes | 17 - 22 |
| 4: Discussion and conclusions | Outcomes—Comment on the extent to which PPI influenced the study overall. Describe positive and negative effects | 22 - 27 |
| 5: Reflections/critical perspective | Comment critically on the study, reflecting on the things that went well and those that did not, so others can learn from this experience | 26 - 27 |

1. *PPI* patient and public involvement
